# Supplementary material for: Predicting wildfire burned area in South Central US using integrated machine learning techniques
Source: Copernicus journal article supplement (doi:10.5194/acp-2019-885), 2019-11-04
Supplement: Supplementary file 1 [file acp-2019-885-supplement.pdf]

# Supplement

**Table S1.** Model performance at grid level for the selected years (excluding the misclassified grids).

| Year/Fire season                        | Including misclassified grids |                         |                        | Excluding misclassified grids |                         |                        |
|-----------------------------------------|-------------------------------|-------------------------|------------------------|-------------------------------|-------------------------|------------------------|
|                                         | R <sup>2</sup>                | RMSE (km <sup>2</sup> ) | MAE (km <sup>2</sup> ) | R <sup>2</sup>                | RMSE (km <sup>2</sup> ) | MAE (km <sup>2</sup> ) |
| 2011 (combine winter-spring and summer) | 0.30                          | 11.04                   | 3.38                   | 0.42                          | 21.06                   | 5.25                   |
| 2014 (winter-spring)                    | 0.30                          | 5.19                    | 1.05                   | 0.51                          | 5.87                    | 0.77                   |
| 2008 (summer)                           | 0.42                          | 1.58                    | 0.38                   | 0.66                          | 1.75                    | 0.43                   |

5

10

15

20

25 **Table S2.** Studies using statistical methods to estimate burned area

| Region                       | period               | Method                                          | Spatial domain                                   | Spatial scale<br>(estimated; km <sup>2</sup> ) | Temporal scale | R <sup>2</sup>                    | Reference                      |
|------------------------------|----------------------|-------------------------------------------------|--------------------------------------------------|------------------------------------------------|----------------|-----------------------------------|--------------------------------|
| Canada                       | 1959-1997            | MLR                                             | Ecoregions                                       | 466x466~1123x1123                              | Monthly        | 36-64%                            | Flannigan et al. (2005)        |
| Portugal                     | 1980-2004            | MLR                                             | Portuguese districts                             | 50x50~100x100                                  | Monthly        | 43-80%                            | Carvalho et al. (2010)         |
| Alaska and Canada            | 1960-2002            | MARS                                            | Alaska and western Canada                        | 100x100~235x235                                | Annually       | 82%                               | Balshi et al. (2009)           |
| EU-Mediterranean             |                      | MLR                                             | European Mediterranean basin                     | 1400x1400                                      | Monthly        | 87%                               | Camia and Amatulli (2009)*     |
| Western US                   | 1916-2003            | MLR <sup>1</sup>                                | Ecoregions                                       | 600x600~1000x1000                              | Annually       | 25-57%                            | Listtell et al. (2009)         |
| Western US                   | 1980-2004            | MLR                                             | Ecoregions                                       | 600x600~1000x1000                              | Annually       | 37-57%                            | Spracklen et al. (2009)        |
| Western US                   | 1972-1988; 1989-2005 | MLR, RF <sup>2</sup>                            | NUTS3 <sup>4</sup>                               | 600x600~1000x1000                              | Annually       | 73%; 83%                          | Westerling et al. (2011)       |
| EU-Mediterranean             | 1985-2004            | MLR                                             | Countries                                        | 300x300~1000x1000                              | Monthly        | 39-69%                            | Amatulli et al. (2013)         |
| EU-Mediterranean             | 1985-2004            | RF                                              | Countries                                        |                                                | Monthly        | 33-72%                            | Amatulli et al. (2013)         |
| EU-Mediterranean             | 1985-2004            | MARS <sup>3</sup>                               | Countries                                        |                                                | Monthly        | 43-77%                            | Amatulli et al. (2013)         |
| Spain                        | 1990-2008            | MARS                                            | Phytoclimatic zones                              | 25x25~100x100                                  | Monthly        | 1-37%                             | Bedia et al. (2013)            |
| Western US                   | 1916-2004            | MLR                                             | Ecoregions                                       | 600x600~1000x1000                              | Annually       | 25-60%                            | Yue et al. (2013)              |
| Western US                   | 1916-2004            | Parameterization                                | Ecoregions                                       |                                                | Annually       | 1-69%                             | Yue et al. (2013)              |
| North-eastern Spain          | 1983-2012            | MLR                                             | Catalonia                                        | 300x300                                        | Annually       | 33%                               | Marcos et al. (2015)           |
| Iberian Peninsula            | 1981-2005            | MLR                                             | Pyro-regions                                     | 200x200~700x700                                | Monthly        | 52-72%                            | Sousa et al. (2015)            |
| EU-Mediterranean             | 1985-2011            | MLR                                             | EUMED <sup>5</sup>                               | 2000x2000                                      | Annually       | 60%                               | Urbieta et al. (2015)          |
| Pacific western coast of USA | 1985-2011            | MLR                                             | Oregon and California                            | 1000x1000                                      | Annually       | 37%                               | Urbieta et al. (2015)          |
| British Columbia, Canada     | 1961-2010            | MLR                                             | Southern Cordillera                              | 1400x1400                                      | Annually       | 55%                               | Kirchmeier-Young et al. (2018) |
| Catalonia, Iberian Peninsula | 1982-2015            | MLR                                             | Fire regime zones                                | 80x80~150x150                                  | Annually       | 57-91%                            | Duane et al. (2019)            |
| South-Central US             | 2002-2015            | Integration of RF, logistic regression, and QRF | Eastern Texas, Oklahoma, Louisiana, and Arkansas | 700x700                                        | Monthly        | 50% (winter-spring); 79% (summer) | This study                     |

<sup>1</sup> MLR: Multiple Linear Regression; <sup>2</sup> RF: Random forest; <sup>3</sup> MARS: Multivariate adaptive regression Splines; <sup>4</sup> NUTS3: Nomenclature of Territorial Units at the third level <sup>5</sup> EUMED: burned area summation over Portugal, Spain, South France, Italy and Greece

30 \*: focus on only large fires

**Table S3.** The mean scaled absolute percentage of each effects for the two fire seasons calculated by decompose analysis at  
35 large-scale domain

|                      | <b>Weather effect</b> | <b>Fuel effect</b> | <b>Climate effect</b> | <b>Fix effect</b> | <b>Interaction effect</b> |
|----------------------|-----------------------|--------------------|-----------------------|-------------------|---------------------------|
| <b>Spring-winter</b> | 12.57                 | 21.39              | 33.23                 | 22.93             | 10.87                     |
| <b>Summer</b>        | 16.26                 | 17.29              | 35.79                 | 21.8              | 8.87                      |

**Table S4.** The mean variable importance metrics (%IncMSE) of each effect for the two fire seasons calculated based on grid  
40 burned area prediction

|                      | <b>Weather effect</b> | <b>Fuel effect</b> | <b>Climate effect</b> | <b>Fix effect</b> |
|----------------------|-----------------------|--------------------|-----------------------|-------------------|
| <b>Spring-winter</b> | 8.20                  | 9.04               | 12.09                 | 6.56              |
| <b>Summer</b>        | 9.12                  | 4.85               | 19.18                 | 4.59              |

45

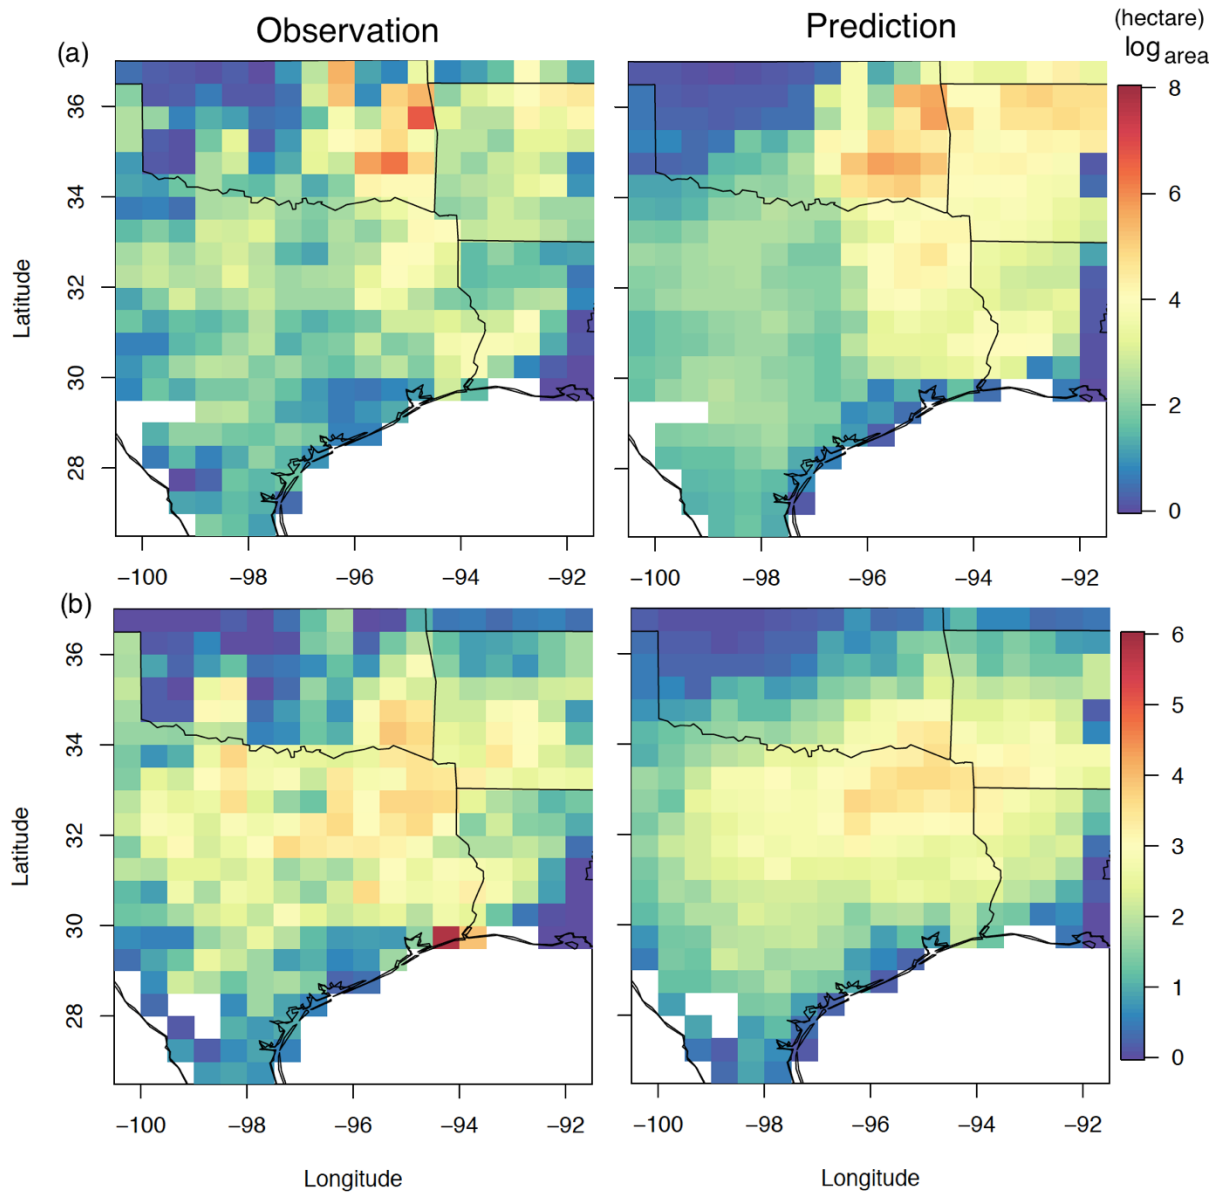

**Figure S1.** Map of monthly mean observed and predicted burned area averaged from 2002 to 2015 for the (a) winter-spring and (b) summer fire season.

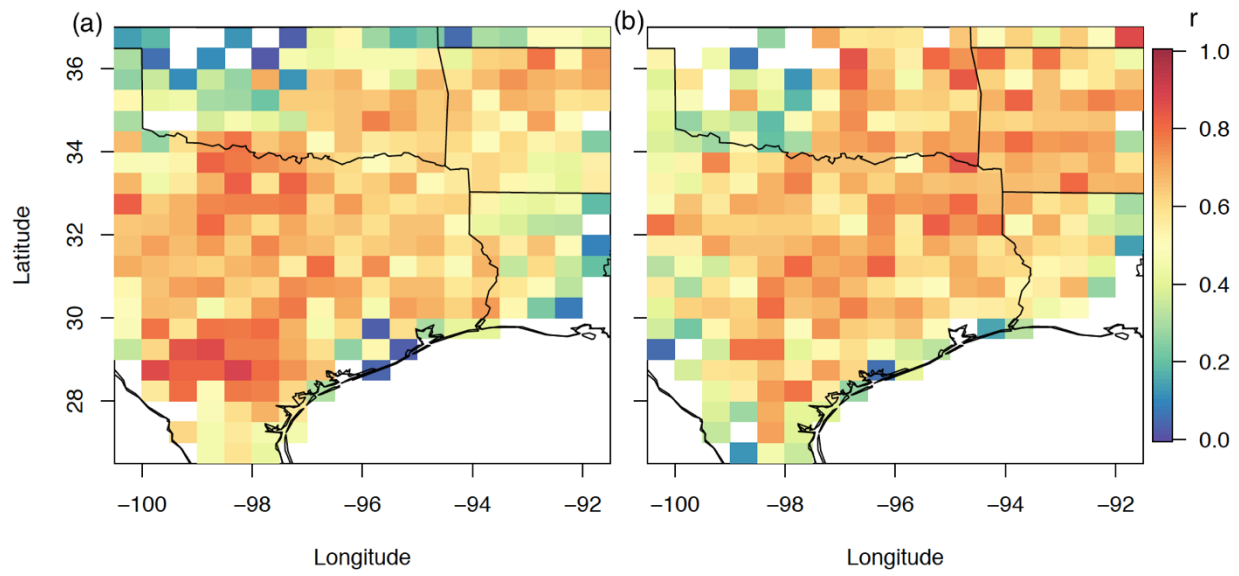

55 **Figure S2.** Maps of temporal correlation between observed and predicted burned area for each grid for the (a) winter-spring fire season (b) summer fire season.

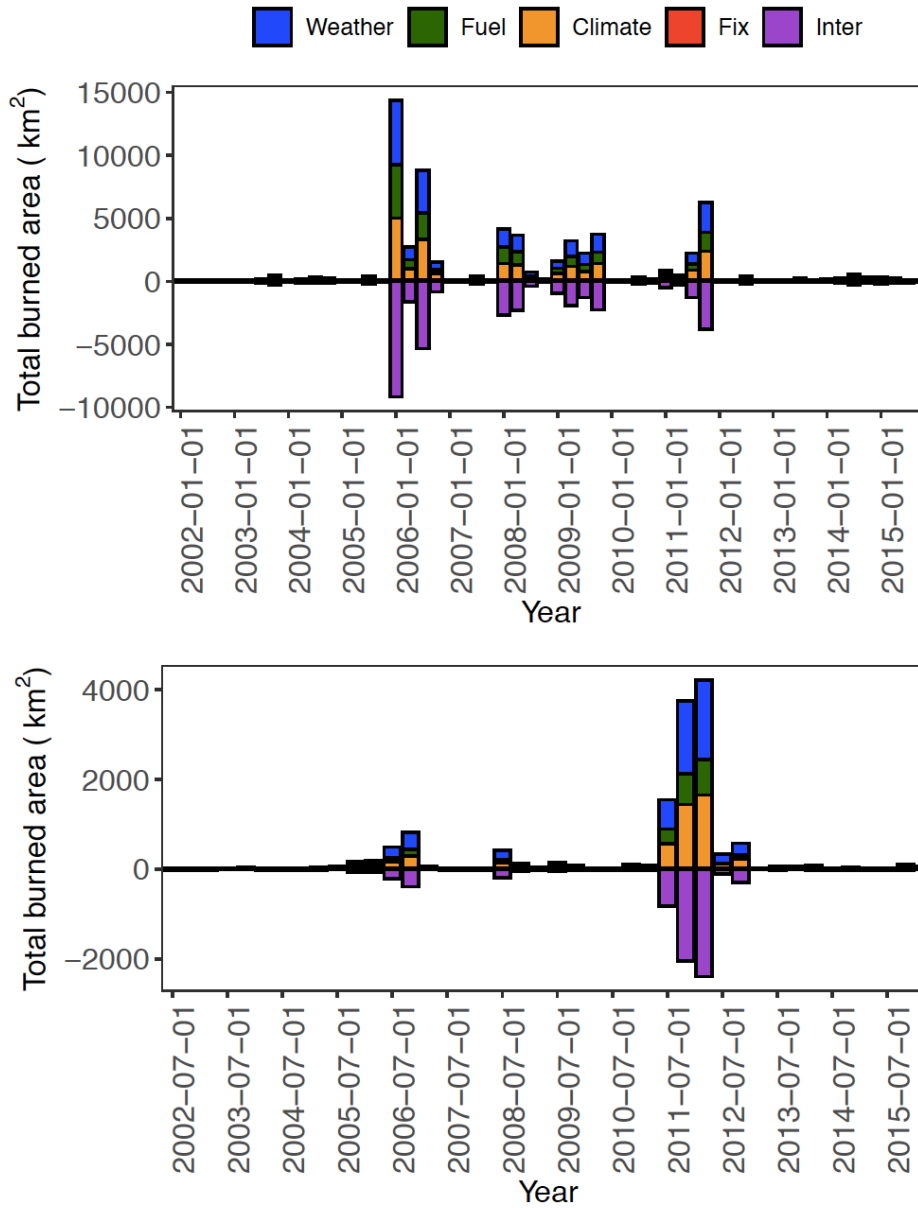

**Figure S3.** Timeseries of burned area contributed by different environmental controls for the winter-spring (top) and summer fire season (bottom). Color of blue, green, yellow, red, and purple indicate effect of weather, fuel, climate, fix, and interaction.

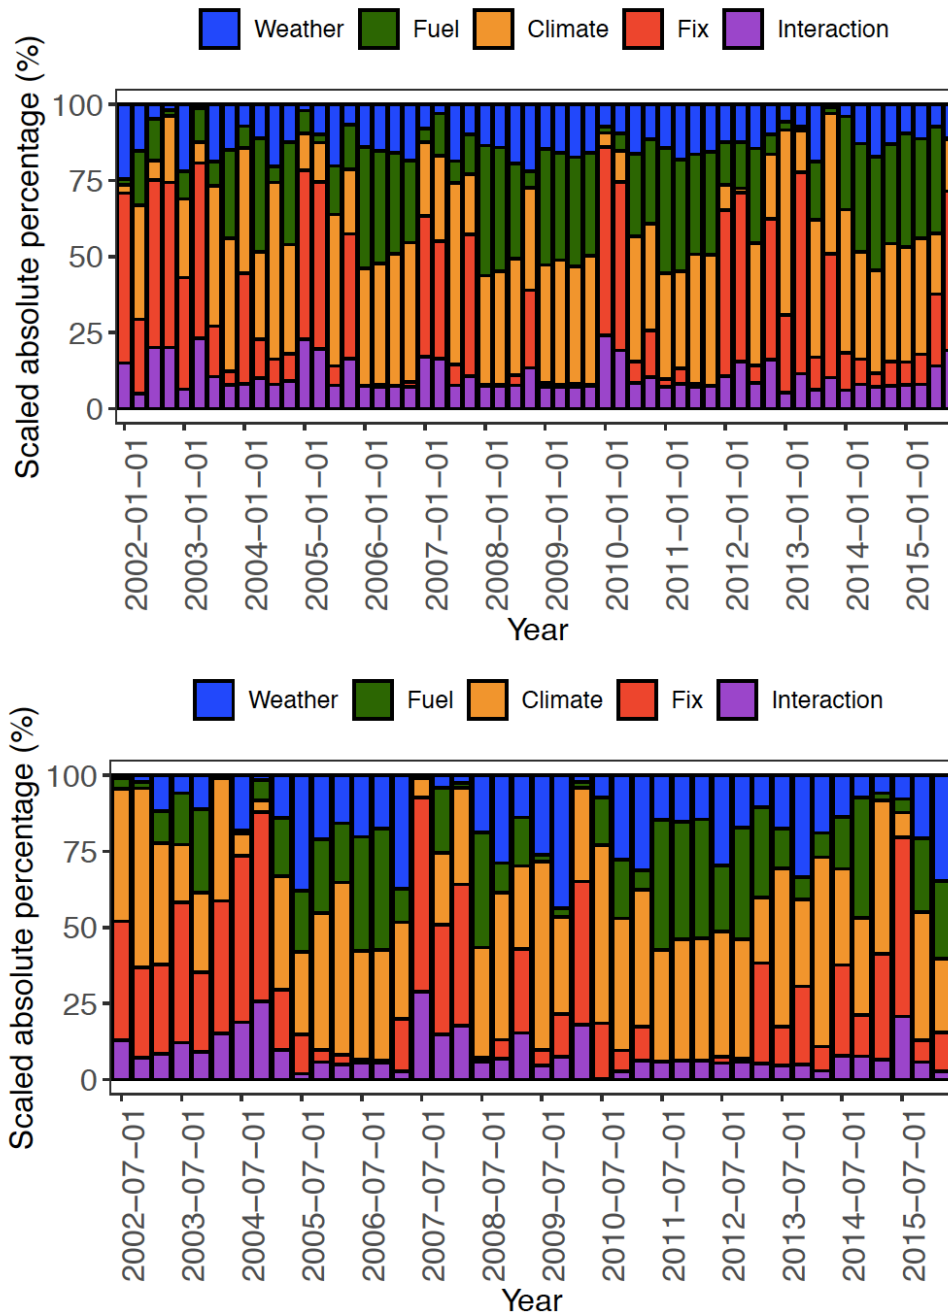

65 **Figure S4.** Timeseries of the scaled absolute percentage for the (a) winter-spring fire season and (b) summer fire season. Color of blue, green, yellow, red, and purple indicate effect of weather, fuel, climate, fix, and interaction.

## 70 **Calculation of correlation coefficient (r)**

We also calculated two types of correlation coefficient (r) to evaluate model performance: spatial r and temporal r. For the spatial r, for each month, we calculated the correlation coefficient of the prediction and observation for all the grids over the whole domain. As for the temporal r, for each grid, we calculated the correlation coefficient for the timeseries of  
75 observed and predicted burned area. At the end, we obtain a map showing the temporal R, demonstrated in Figure S2.

80
